# Supplementary material
Source: Springer Nature journal article supplement (https://www.springermedizin.de/resource/supplementary/13023_2013_698_MOESM3_ESM.pdf/9642980)
Supplement: MOESM3 [file 9642980]

**Disease duration among symptomatic women**

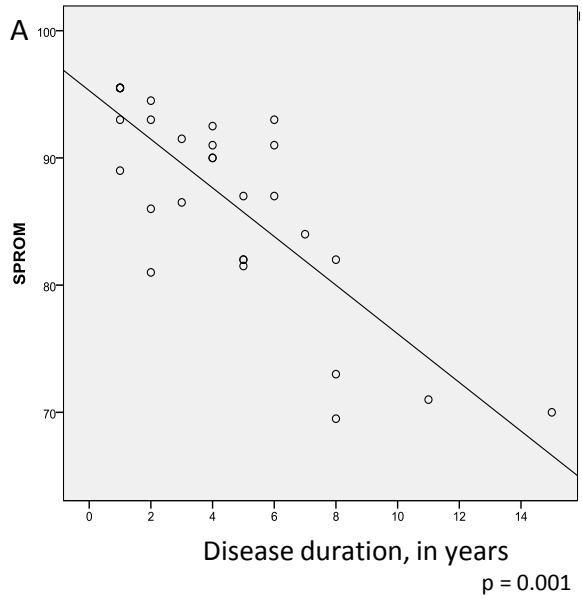

**Age at examination of all heterozygote women**

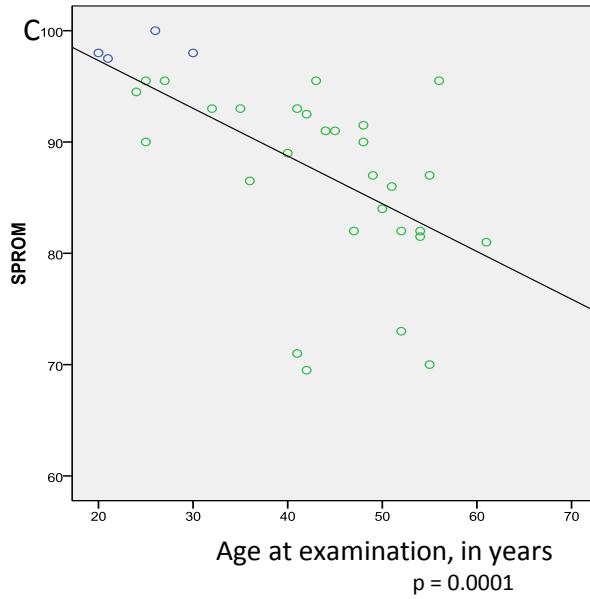

**Somato-sensory evoked responses of lower limbs of heterozygote women**

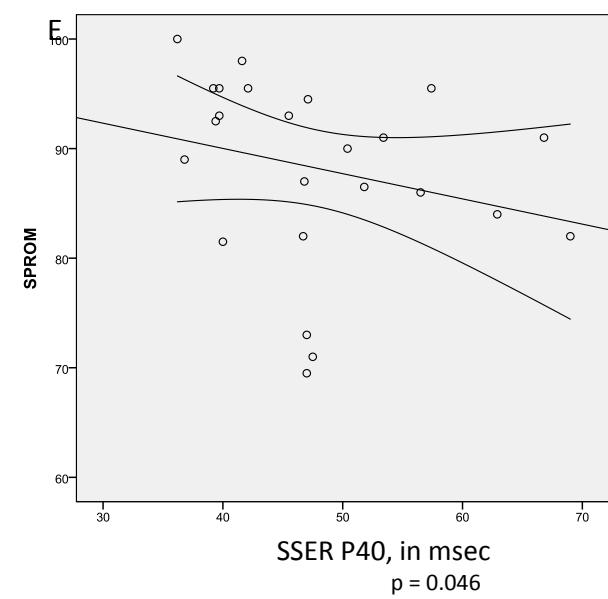

**SSPROM**

**JOA**

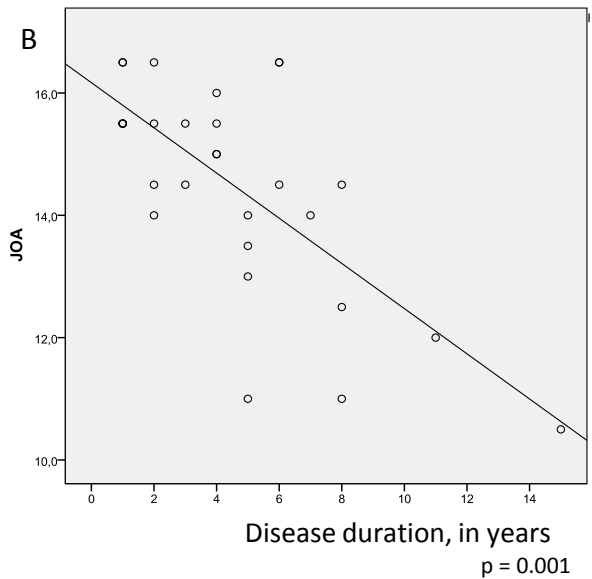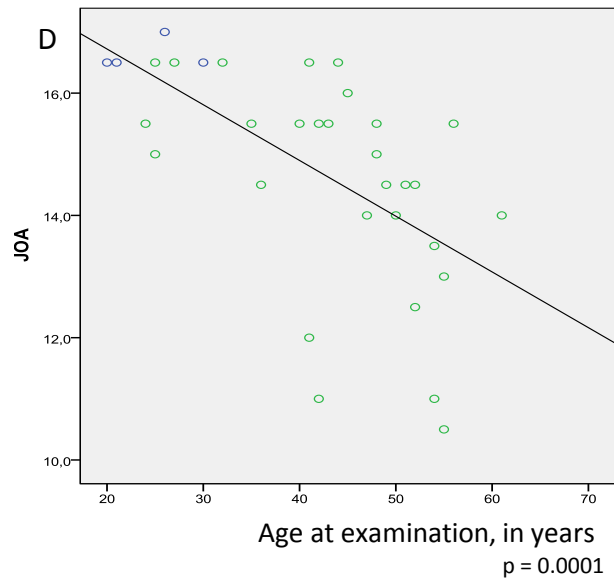

**Symptomatic:**

- No
- Yes
